# Supplementary material
Source: PubMed Central journal article supplement (PMC5003288)
Supplement: pnas.1521741113.sapp.pdf [file pnas.1521741113.sapp.pdf]

## 1 **SI Material and Methods**

2

3 **Insect Rearing.** *Spodoptera littoralis* larvae were reared on artificial diet (47.25 g/L wheat germ,  
4 67.3 g/L brewer's yeast, 189 g/L corn meal, 6.75 g/L ascorbic acid, 0.75 g/L cholesterol, 0.5 g/L  
5 propyl 4-hydroxybenzoate, 3 g/L methyl 4-hydroxybenzoate, 1.25 g/L wheat germ oil, 33.75 g/L  
6 agar and 3 g/L vitamin mix (1.2 g/Kg vitamin B1, 2.6 g/Kg vitamin B2, 2.5 g/Kg vitamin B6, 40  
7 g/Kg choline, 10 g/Kg pantothenic acid, 32 g/Kg inositol, 0.25 g/Kg biotin, 2.5 g/Kg folic acid, 5  
8 g/Kg 4-aminobenzoic acid, 0.5 mg/Kg vitamin B12, 10 g/Kg glutathione, 2.1 g/Kg vitamin A, 0.25  
9 g/Kg vitamin D3, 24 g/Kg vitamin E, 0.25 g/Kg vitamin K, 25 g/Kg vitamin C in dextrose)), at 25 ±  
10 1°C, 70 ± 5% R.H., and under a 16:8 h light/dark period.

11

12 **Cry1Ca Toxin Preparation and Toxicity Bioassays.** The Cry1Ca protein was produced in a  
13 recombinant *Bacillus thuringiensis* (*Bt*) strain EG1081, kindly supplied by Ecogen Inc. Production  
14 and purification of Cry1Ca was done as previously described (1). The purity of the Cry1Ca  
15 preparation was checked by SDS-PAGE. Prior to use, Cry1Ca was dialyzed overnight, at 4°C in 50  
16 mM sodium carbonate buffer, pH 9.0. After dialysis, toxin concentration was determined by  
17 Bradford assay (2), using bovine serum albumin as standard.

18 The experimental larvae were singly isolated in multi-well plastic trays (Bio-Ba-32, Color-Dec,  
19 Italy), containing artificial diet, covered with perforated plastic lids (Bio-Cv-4, Color-Dec), and  
20 maintained under the rearing conditions reported above. For the first three days, the upper surface  
21 (1 cm<sup>2</sup>) of the artificial diet (0.3 cm<sup>3</sup>) was uniformly overlaid with 50 µL of water suspension of  
22 Xentari™ (Valent BioSciences), a bioinsecticide based on *Bt* subsp. *aizawai* and containing several  
23 Cry toxins (Cry1Aa, Cry1Ab, Cry1Ca, Cry1Da, and Cry2Ab), or of purified Cry1Ca toxin (the  
24 component of Xentari™ most active against *S. littoralis* (3)) dissolved in 50 mM sodium carbonate  
25 buffer at pH 9.0, which was prepared as described above. Control larvae were reared on artificial  
26 diet overlaid with 50 µL sodium carbonate buffer or water, as appropriate. Experimental larvae

27 were maintained on artificial diet, replaced every 24 h, and daily inspected for survival, until  
28 pupation. The experimental procedure is schematically summarized in Fig. S7.

29 To determine the 50% lethal concentration (LC<sub>50</sub>) of Xentari™ and Cry1Ca toxin, the bioassay  
30 described above was carried out at 5 different concentrations plus a control using 16 larvae for each  
31 experimental condition. Mortality was assessed after 8 days and Probit analysis (4) was performed  
32 with the POLO-PC program (LeOra Software, Berkeley, CA, USA), to determine LC<sub>50</sub> values, 95%  
33 fiducial limits and toxicity increase ratio (TI) for each experimental treatment.

34  
35 **qRT-PCR.** Total RNA was isolated from experimental samples by using TRIzol Reagent  
36 (Invitrogen), according to the manufacturer's instructions. The concentration and purity of total  
37 RNA were determined using a Varioskan™ Flash Multimode Reader (Thermo Scientific, Waltham,  
38 MA, USA). Differential relative expression of considered genes was assessed by means of SYBR-  
39 Green qRT-PCR, using the primer pairs reported in Table S6. Relative gene expression data were  
40 analyzed using the 2<sup>ΔΔCT</sup> method. For validation of the ΔΔCt method the difference between the Ct  
41 value of AMPs, *lysozyme Ia* or *16S rRNA* and the Ct value of *β-actin* transcripts [ΔCt = Ct(sample)-  
42 Ct (β-Actin)] was plotted versus the log of two-fold serial dilutions (200, 100, 50, 25 and 12.5 ng)  
43 of the purified RNA samples. The plot of log total RNA input versus ΔCt displayed a slope lower  
44 than 0.1 (*attacin I*: Y=1.3987 + 0.0144X, R<sup>2</sup> = 0.0565; *gloverin*: Y=1.3567 + 0.013X, R<sup>2</sup> =0.0715;  
45 *lysozyme Ia*: Y=1.690 + 0.0124X, R<sup>2</sup> =0.0313; *16S rRNA*: Y=1.447 + 0.0128X, R<sup>2</sup> =0.0576),  
46 indicating that the efficiencies of the two amplicons were approximately equal.

47  
48 **Bioinformatics analysis of the 16S rRNA gene sequencing data.** Raw reads were filtered  
49 according to the 454 processing pipeline. Sequences were then analyzed and further filtered by  
50 using QIIME 1.7.0 software (5) as previously described (6). Operational Taxonomic Units (OTU),  
51 defined by a similarity of 97%, were picked using the uclust method (7), and the representative  
52 sequences were submitted to the RDPII classifier (8) to obtain the taxonomy assignment and the

53 relative abundance of each OTU using the Greengenes *16S rRNA* gene database (9). Alpha diversity  
54 and beta diversity were evaluated through QIIME as previously reported (10).

55

56 **Light Microscopy and Transmission Electron Microscopy.** The experimental larvae, obtained as  
57 described in the main text, 5 days after the onset of the experiment were chilled on ice and dissected  
58 to isolate the midgut. Synchronous starved controls were also processed to assess the impact on  
59 midgut tissues by feeding cessation following intoxication. The samples were fixed in 4 %  
60 glutaraldehyde (in 0.1 M Na-cacodylate buffer, pH 7.4) overnight, at 4 °C, and embedded in an  
61 Epon/Araldite 812 mixture as described previously (11). Semi-thin sections were stained with  
62 crystal violet and basic fuchsin and observed by using a Nikon Eclipse Ni-U microscope equipped  
63 with a DS-5 M-L1 digital camera system (Nikon, Tokyo, Japan). Thin sections, stained with uranyl  
64 acetate and lead citrate, were observed by using a Jeol JEM-1010 electron microscope (Jeol, Tokyo,  
65 Japan) and images were acquired with an Olympus Morada digital camera (Olympus, Münster,  
66 Germany).

67

## 68 **References**

69

- 70 1. Estela A, Escriche B, Ferré J (2004) Interaction of *Bacillus thuringiensis* toxins with larval  
71 midgut binding sites of *Helicoverpa armigera* (Lepidoptera: Noctuidae). *Appl Environ*  
72 *Microbiol* 70:1378-1384.
- 73 2. Bradford MM (1976) A rapid and sensitive method for the quantitation of microgram  
74 quantities of protein utilizing the principle of protein-dye binding. *Anal Biochem* 72:248-  
75 254.
- 76 3. van Frankenhuyzen K (2009) Insecticidal activity of *Bacillus thuringiensis* crystal proteins.  
77 *J Invertebr Pathol* 101:1-16.
- 78 4. Finney DJ (1971) Probit analysis. Cambridge University, Cambridge, United Kingdom.

- 79 5. Caporaso JG et al. (2010) QIIME allows analysis of high-throughput community sequencing  
80 data. *Nat Methods* 7:335-336.
- 81 6. De Filippis F, La Stora A, Stellato G, Gatti M, Ercolini D (2014) A selected core  
82 microbiome drives the early stages of three popular Italian cheese manufactures. *PLoS ONE*  
83 9:e89680.
- 84 7. Edgar RC (2010) Search and clustering orders of magnitude faster than BLAST.  
85 *Bioinformatics* 26:2460-2461.
- 86 8. Wang Q, Garrity GM, Tiedje JM, Cole JR (2007) Naïve Bayesian classifier for rapid  
87 assignment of rRNA sequences into the new bacterial taxonomy. *Appl Environ Microbiol*  
88 73:5261-5267.
- 89 9. McDonald D et al. (2012) An improved Greengenes taxonomy with explicit ranks for  
90 ecological and evolutionary analyses of bacteria and archaea. *ISME J* 6:610-618.
- 91 10. De Filippis F, La Stora A, Villani F, Ercolini D (2013) Exploring the sources of beefsteaks  
92 contamination by culture-independent high-throughput sequencing. *PLoS ONE* 8:e70222.
- 93 11. Franzetti E et al. (2015) The midgut of the silkworm *Bombyx mori* is able to recycle  
94 molecules derived from degeneration of the larval midgut epithelium. *Cell Tissue Res*  
95 361:509-528.

96

97

98 **Table S1. Statistical analysis of the data reported in figures 1D, 3, S2.**

| <b>Figure 1D and S2</b>      |                            |                             |                             |                              |
|------------------------------|----------------------------|-----------------------------|-----------------------------|------------------------------|
|                              | interaction                | dsRNA treatment             | immune challenge            |                              |
| <b>Figure 1D</b>             |                            |                             |                             |                              |
| <i>attacin 1</i>             | $F_{3,66}=0.36; P=0.784$   | $F_{1,66}=0.13; P=0.7182$   | $F_{3,66}=198.13; P<0.0001$ |                              |
| <i>gloverin</i>              | $F_{3,66}=0.07; P=0.9734$  | $F_{1,66}=1.53; P=0.2295$   | $F_{3,66}=39.58; P<0.0001$  |                              |
| <i>lysozyme 1a</i>           | $F_{3,66}=0.16; P=0.9241$  | $F_{1,66}=0.07; P=0.7989$   | $F_{3,66}=95.60; P<0.0001$  |                              |
| <b>Figure S2A (midgut)</b>   |                            |                             |                             |                              |
| <i>attacin 1</i>             | $F_{3,66}=0.09; P=0.9647$  | $F_{1,66}=0.36; P=0.5523$   | $F_{3,66}=83.23; P<0.0001$  |                              |
| <i>gloverin</i>              | $F_{3,66}=0.21; P=0.8874$  | $F_{1,66}=0.33; P=0.5701$   | $F_{3,66}=61.58; P<0.0001$  |                              |
| <i>lysozyme 1a</i>           | $F_{3,66}=0.34; P=0.7935$  | $F_{1,66}=0.48; P=0.4941$   | $F_{3,66}=62.38; P<0.0001$  |                              |
| <b>Figure S2B (fat body)</b> |                            |                             |                             |                              |
| <i>attacin 1</i>             | $F_{3,66}=0.45; P=0.7177$  | $F_{1,66}=0.04; P=0.8351$   | $F_{3,66}=27.86; P<0.0001$  |                              |
| <i>gloverin</i>              | $F_{3,66}=0.39; P=0.7618$  | $F_{1,66}=0.61; P=0.9605$   | $F_{3,66}=26.16; P<0.0001$  |                              |
| <i>lysozyme 1a</i>           | $F_{3,66}=1.56; P=0.2062$  | $F_{1,66}=0.25; P=0.6189$   | $F_{3,66}=32.16; P<0.0001$  |                              |
| <b>Figure 3</b>              |                            |                             |                             |                              |
|                              | interaction                | dsRNA treatment             | Cry1Ca treatment            | Time                         |
| <b>Figure 3A and B</b>       |                            |                             |                             |                              |
|                              | $F_{3,176}=0.08; P=0.924$  | $F_{1,176}=22.65; P<0.0001$ | $F_{3,176}=45.65; P<0.0001$ | $F_{3,176}=310.36; P<0.0001$ |
| <b>Figure 3C and D</b>       |                            |                             |                             |                              |
|                              | $F_{2,81}=24.63; P<0.0001$ | $F_{1,81}=30.63; P<0.0001$  | $F_{2,81}=16.94; P<0.0001$  | $F_{2,81}=0.09; P=0.965$     |

99

100

101 **Table S2. Microbial viable counts.**

|                                                      | Log CFU/mL $\pm$ S.D.*       |
|------------------------------------------------------|------------------------------|
| <b><i>102 Sl</i> dsRNA</b>                           |                              |
| Control (M)                                          | 6.68 $\pm$ 0.20 <sup>a</sup> |
| Control (H)                                          | 4.28 $\pm$ 0.29 <sup>b</sup> |
| 0.2 $\mu$ g protein/cm <sup>2</sup> (H)              | 5.94 $\pm$ 0.32 <sup>b</sup> |
| 1.2 $\mu$ g protein/cm <sup>2</sup> (H) <sup>†</sup> | 8.73 $\pm$ 0.23 <sup>c</sup> |
| <b><i>GFP</i> dsRNA</b>                              |                              |
| Control (M)                                          | 6.48 $\pm$ 0.44 <sup>a</sup> |
| Control (H)                                          | 4.22 $\pm$ 0.20 <sup>b</sup> |
| 1.2 $\mu$ g protein/cm <sup>2</sup> (H)              | 5.42 $\pm$ 0.16 <sup>c</sup> |
| 6.6 $\mu$ g protein/cm <sup>2</sup> (H) <sup>†</sup> | 8.68 $\pm$ 0.01 <sup>d</sup> |

102  
 103 Number of bacteria was assessed in the midgut content (M) and in the haemolymph (H) of *Spodoptera*  
 104 *littoralis* larvae treated with *GFP* dsRNA or *102 Sl* dsRNA and exposed to different doses of Cry1Ca.

105 \*Data are expressed as mean of Log CFU (Colony Forming Units)/ml  $\pm$  S.D. of two independent  
 106 experiments. Within the same type of treatment, different letters denote statistically significant differences  
 107 (One-Way ANOVA;  $P < 0.0001$ ,  $F = 56.61$ ,  $df = 3$ ,  $n = 4$  for *102 Sl* dsRNA and  $P < 0.0001$ ,  $F = 238.62$ ,  $df = 3$ ,  $n = 4$   
 108 for *GFP* dsRNA treated larvae).

109 <sup>†</sup>LC<sub>50</sub> of Cry1Ca.

110

111 **Table S3. Alpha diversity measures.**

|                                                 | Alpha diversity <sup>*</sup> |         |                     |
|-------------------------------------------------|------------------------------|---------|---------------------|
|                                                 | Chao 1                       | Shannon | Good's coverage (%) |
| <b><i>GFP dsRNA</i></b>                         |                              |         |                     |
| Control (M)                                     | 852.28                       | 2.62    | 99                  |
| Control (H)                                     | 1800.40                      | 3.80    | 98                  |
| 1.2 µg protein/cm <sup>2</sup> (M)              | 769.92                       | 2.87    | 99                  |
| 1.2 µg protein/cm <sup>2</sup> (H)              | 1672.79                      | 4.04    | 98                  |
| 6.6 µg protein/cm <sup>2</sup> (M) <sup>#</sup> | 1065.13                      | 3.48    | 98                  |
| 6.6 µg protein/cm <sup>2</sup> (H) <sup>#</sup> | 1040.08                      | 2.80    | 99                  |
| <b><i>102 Sl dsRNA</i></b>                      |                              |         |                     |
| Control (M)                                     | 724.45                       | 2.24    | 99                  |
| Control (H)                                     | 2200.32                      | 4.67    | 98                  |
| 0.2 µg protein/cm <sup>2</sup> (M)              | 717.44                       | 2.49    | 99                  |
| 0.2 µg protein/cm <sup>2</sup> (H)              | 2480.00                      | 4.93    | 98                  |
| 1.2 µg protein/cm <sup>2</sup> (M) <sup>#</sup> | 687.24                       | 2.42    | 99                  |
| 1.2 µg protein/cm <sup>2</sup> (H) <sup>#</sup> | 1183.64                      | 2.50    | 99                  |

112

113 Average observed diversity and estimated sample coverage was calculated, in 3 independent experiments, for  
 114 *I6S rRNA* amplicons of midgut content (M) and haemolymph (H) samples of *Spodoptera littoralis* larvae,  
 115 treated with *102 Sl dsRNA* or *GFP dsRNA* and exposed to different doses of Cry1Ca.

116 <sup>\*</sup>Chao 1 richness, Shannon diversity, and Good's coverage were calculated with Qiime at the 3% distance  
 117 level. <sup>#</sup>LC<sub>50</sub> of Cry1Ca.

118

119 **Table S4. Relative abundances of microbial taxa.**

| <i>Taxon</i>                   | Incidence* (%)   |                             |                             |              |                             |                             |                     |                             |                             |              |                             |                             |
|--------------------------------|------------------|-----------------------------|-----------------------------|--------------|-----------------------------|-----------------------------|---------------------|-----------------------------|-----------------------------|--------------|-----------------------------|-----------------------------|
|                                | <i>GFP dsRNA</i> |                             |                             |              |                             |                             | <i>102 SI dsRNA</i> |                             |                             |              |                             |                             |
|                                | Control<br>H     | 1.2 µg/cm <sup>2</sup><br>H | 6.6 µg/cm <sup>2</sup><br>H | Control<br>M | 1.2 µg/cm <sup>2</sup><br>M | 6.6 µg/cm <sup>2</sup><br>M | Control<br>H        | 0.2 µg/cm <sup>2</sup><br>H | 1.2 µg/cm <sup>2</sup><br>H | Control<br>M | 0.2 µg/cm <sup>2</sup><br>M | 1.2 µg/cm <sup>2</sup><br>M |
| <i>Acetobacter sp.</i>         | 52.559           | 47.156                      | 4.980                       | 1.182        | 0.712                       | 0.831                       | 42.556              | 36.689                      | 5.000                       | 0.875        | 2.659                       | 0.449                       |
| <i>Acetobacter orleanensis</i> | 6.634            | 6.923                       | 1.376                       | 0.368        | 0.359                       | 0.439                       | 6.081               | 7.566                       | 1.498                       | 0.480        | 0.941                       | 0.272                       |
| <i>Acetobacteraceae</i>        | 0.198            | 0.014                       | 0                           | 0            | 0                           | 0.005                       | 0.056               | 0.010                       | 0                           | 0            | 0                           | 0                           |
| <i>Acidovorax sp.</i>          | 0.008            | 0.018                       | 0                           | 0            | 0.006                       | 0.125                       | 0.015               | 0.029                       | 0                           | 0            | 0                           | 0.010                       |
| <i>Acinetobacter sp.</i>       | 2.565            | 0.294                       | 0                           | 0            | 0.006                       | 0.005                       | 0.030               | 0.039                       | 0.010                       | 0            | 0                           | 0.005                       |
| <i>Actinobacteria</i>          | 0.012            | 0.047                       | 0.003                       | 0.008        | 0                           | 0                           | 0.139               | 0.128                       | 0.003                       | 0.004        | 0.005                       | 0                           |
| <i>Actinomyces oris</i>        | 0.113            | 0                           | 0                           | 0            | 0                           | 0.005                       | 0.256               | 0.007                       | 0                           | 0            | 0                           | 0                           |
| <i>Bacilli</i>                 | 0.093            | 0.165                       | 0.029                       | 0.030        | 0.046                       | 0.078                       | 0.090               | 0.189                       | 0.026                       | 0.011        | 0.022                       | 0.005                       |
| <i>Betaproteobacteria</i>      | 0.020            | 0.125                       | 0.003                       | 0            | 0                           | 0.031                       | 0.105               | 0.277                       | 0.003                       | 0            | 0                           | 0.005                       |
| <i>Carnobacteriaceae</i>       | 0.028            | 0.004                       | 0                           | 0            | 0                           | 0.026                       | 0.045               | 0.228                       | 0.003                       | 0            | 0                           | 0.005                       |
| <i>Caulobacteraceae</i>        | 0.532            | 0.047                       | 0                           | 0            | 0                           | 0                           | 0.023               | 0.039                       | 0.003                       | 0            | 0                           | 0                           |
| <i>Clostridium sp.</i>         | 0.464            | 1.142                       | 26.672                      | 54.104       | 60.839                      | 51.203                      | 1.437               | 0.567                       | 20.890                      | 50.157       | 68.031                      | 32.838                      |
| <i>Comamonadaceae</i>          | 0.012            | 0.057                       | 0.003                       | 0            | 0                           | 0.058                       | 0.045               | 0.140                       | 0                           | 0            | 0                           | 0                           |
| <i>Corynebacterium sp.</i>     | 0.008            | 0.025                       | 0.003                       | 0            | 0.006                       | 0.005                       | 0.075               | 4.800                       | 0.010                       | 0.004        | 0                           | 0                           |
| <i>Deltaproteobacteria</i>     | 0.561            | 0.263                       | 0.075                       | 0.015        | 0.011                       | 0.335                       | 1.775               | 5.325                       | 0.071                       | 0.014        | 0.011                       | 0.015                       |
| <i>Enterobacteriaceae</i>      | 0.496            | 0.075                       | 3.304                       | 2.649        | 1.721                       | 1.788                       | 0.387               | 0.061                       | 3.566                       | 3.238        | 1.408                       | 4.618                       |



Continued table S4

| Taxon                            | GFP dsRNA    |                                    |                                    |              |                                    |                                    | 102 SI dsRNA |                                    |                                    |              |                                    |                                    |
|----------------------------------|--------------|------------------------------------|------------------------------------|--------------|------------------------------------|------------------------------------|--------------|------------------------------------|------------------------------------|--------------|------------------------------------|------------------------------------|
|                                  | Control<br>H | 1.2 $\mu\text{g}/\text{cm}^2$<br>H | 6.6 $\mu\text{g}/\text{cm}^2$<br>H | Control<br>M | 1.2 $\mu\text{g}/\text{cm}^2$<br>M | 6.6 $\mu\text{g}/\text{cm}^2$<br>M | Control<br>H | 0.2 $\mu\text{g}/\text{cm}^2$<br>H | 1.2 $\mu\text{g}/\text{cm}^2$<br>H | Control<br>M | 0.2 $\mu\text{g}/\text{cm}^2$<br>M | 1.2 $\mu\text{g}/\text{cm}^2$<br>M |
| <i>Enterococcus sp.</i>          | 3.404        | 16.019                             | 6.017                              | 7.512        | 11.189                             | 18.328                             | 8.070        | 10.524                             | 2.337                              | 1.441        | 5.323                              | 3.324                              |
| <i>Enterococcus lactis</i>       | 0.540        | 2.126                              | 0.382                              | 0.565        | 0.456                              | 2.777                              | 1.200        | 1.690                              | 0.117                              | 0.160        | 1.267                              | 0.425                              |
| <i>Escherichia sp.</i>           | 0.113        | 0.032                              | 0.016                              | 0.008        | 0                                  | 0.010                              | 0.335        | 0.201                              | 0.013                              | 0.004        | 0                                  | 0                                  |
| <i>Gammaproteobacteria</i>       | 0.552        | 3.275                              | 0.085                              | 0.049        | 0.034                              | 0.878                              | 2.159        | 5.742                              | 0.052                              | 0.011        | 0.049                              | 0.025                              |
| <i>Hyphomicrobium sp.</i>        | 0.141        | 0.476                              | 0.026                              | 0.019        | 0.011                              | 0.251                              | 0.478        | 1.386                              | 0.023                              | 0            | 0.016                              | 0.005                              |
| <i>Hyphomicrobium zavarzinii</i> | 0.077        | 0.254                              | 0.026                              | 0            | 0                                  | 0.068                              | 0.165        | 0.557                              | 0.006                              | 0            | 0.005                              | 0                                  |
| <i>Klebsiella oxytoca</i>        | 0.149        | 0.014                              | 0                                  | 0.004        | 0                                  | 0.005                              | 0.034        | 0.005                              | 0                                  | 0            | 0                                  | 0                                  |
| <i>Lactobacillus brevis</i>      | 3.496        | 2.187                              | 0.603                              | 0.042        | 0.040                              | 0.110                              | 5.111        | 2.644                              | 0.544                              | 0.014        | 0.049                              | 0.099                              |
| <i>Lactobacillus crispatus</i>   | 0.032        | 0.018                              | 0                                  | 0            | 0                                  | 0.005                              | 0.034        | 0.152                              | 0.016                              | 0            | 0                                  | 0                                  |
| <i>Lactobacillus pentosus</i>    | 18.055       | 8.144                              | 0.956                              | 0.110        | 0.108                              | 0.178                              | 9.518        | 6.164                              | 1.184                              | 0.132        | 0.043                              | 0.084                              |
| <i>Lactobacillus sp.</i>         | 0.177        | 0.089                              | 0.016                              | 0            | 0.006                              | 0                                  | 0.154        | 0.091                              | 0.032                              | 0            | 0                                  | 0                                  |
| <i>Lactococcus lactis</i>        | 0.379        | 0.072                              | 0.013                              | 0.008        | 2.404                              | 0.852                              | 0.406        | 0.255                              | 0.146                              | 0.004        | 0.027                              | 0.815                              |
| <i>Leuconostoc sp.</i>           | 0.452        | 0.766                              | 0.228                              | 0.004        | 0                                  | 0.021                              | 0.824        | 1.803                              | 0.252                              | 0.014        | 0.011                              | 0.015                              |
| <i>Limnobacter sp.</i>           | 0.758        | 3.293                              | 0.098                              | 0.042        | 0.046                              | 0.596                              | 2.396        | 6.706                              | 0.081                              | 0.018        | 0.054                              | 0.005                              |
| <i>Mycobacterium sp.</i>         | 0.016        | 0.079                              | 0.003                              | 0            | 0                                  | 0.016                              | 0.038        | 0.155                              | 0.003                              | 0            | 0                                  | 0                                  |
| <i>Nocardioideae</i>             | 0.073        | 0.183                              | 0                                  | 0            | 0                                  | 0.037                              | 0.173        | 0.419                              | 0.006                              | 0            | 0                                  | 0                                  |

Continued table S4

| Taxon                         | GFP dsRNA    |                             |                             |              |                             |                             | 102 SI dsRNA |                             |                             |              |                             |                             |
|-------------------------------|--------------|-----------------------------|-----------------------------|--------------|-----------------------------|-----------------------------|--------------|-----------------------------|-----------------------------|--------------|-----------------------------|-----------------------------|
|                               | Control<br>H | 1.2 µg/cm <sup>2</sup><br>H | 6.6 µg/cm <sup>2</sup><br>H | Control<br>M | 1.2 µg/cm <sup>2</sup><br>M | 6.6 µg/cm <sup>2</sup><br>M | Control<br>H | 0.2 µg/cm <sup>2</sup><br>H | 1.2 µg/cm <sup>2</sup><br>H | Control<br>M | 0.2 µg/cm <sup>2</sup><br>M | 1.2 µg/cm <sup>2</sup><br>M |
| <i>Propionibacterium sp.</i>  | 0.218        | 0.100                       | 0.013                       | 0.004        | 0.040                       | 0.037                       | 0.703        | 0.390                       | 0.026                       | 0            | 0                           | 0.005                       |
| <i>Proteobacteria</i>         | 0.121        | 0.677                       | 0.042                       | 0.023        | 0.091                       | 0.042                       | 0.444        | 0.800                       | 0.032                       | 0.021        | 0.043                       | 0.044                       |
| <i>Pseudonocardia sp.</i>     | 0            | 0                           | 0                           | 0            | 0                           | 0                           | 0.109        | 0.007                       | 0                           | 0            | 0                           | 0                           |
| <i>Serratia sp.</i>           | 0.847        | 0.229                       | 53.080                      | 30.137       | 18.527                      | 16.356                      | 1.685        | 0.125                       | 62.123                      | 40.717       | 16.930                      | 54.963                      |
| <i>Staphylococcus hominis</i> | 0.081        | 0.011                       | 0                           | 0            | 0                           | 0.042                       | 0.105        | 0.064                       | 0.003                       | 0            | 0                           | 0                           |
| <i>Staphylococcus sp.</i>     | 0.181        | 0.011                       | 0.007                       | 0            | 0.011                       | 0.031                       | 0.068        | 0.049                       | 0.010                       | 0            | 0                           | 0                           |
| <i>Streptococcus sp.</i>      | 0.891        | 0.021                       | 0.042                       | 0.061        | 0.091                       | 0.199                       | 2.854        | 0.150                       | 0.123                       | 0.057        | 0.082                       | 0.069                       |
| <i>Other</i>                  | 4.827        | 3.258                       | 1.895                       | 3.058        | 3.242                       | 4.225                       | 9.819        | 3.819                       | 1.786                       | 2.626        | 3.023                       | 1.901                       |

120

121 Relative abundance (%) of OTUs was assigned to the genus/species level based on *16S rRNA* pyrosequencing of RNA samples directly extracted from midgut

122 content (M) and haemolymph (H) of *Spodoptera littoralis* larvae, treated with *102 SI* dsRNA or *GFP* dsRNA and exposed to different doses of Cry1Ca. \*Only

123 OTUs with a relative abundance of 0.1% in at least 1 sample are reported.

124

125 **Table S5. Microbial viable counts in the haemolymph as affected by gavage.**

126

|                            | Log CFU/mL $\pm$ S.D.        |
|----------------------------|------------------------------|
| <b><i>GFP</i> dsRNA</b>    | 4.22 $\pm$ 0.20 <sup>1</sup> |
| <b><i>102 SI</i> dsRNA</b> | 4.28 $\pm$ 0.29 <sup>1</sup> |
| <b>No dsRNA</b>            | 4.00 $\pm$ 1.67 <sup>2</sup> |

127

128 Number of bacteria were assessed in the haemolymph of *Spodoptera littoralis* experimental control larvae  
 129 (i.e. not exposed to Cry1Ca toxin) treated with *GFP* dsRNA or *102 SI* dsRNA or unmanipulated (No  
 130 dsRNA), in order to assess any unintended effect of the gavage procedure on gut permeability to bacterial  
 131 cells. <sup>1</sup>Data are expressed as mean of Log CFU (Colony Forming Units)/ml  $\pm$  S.D. of two independent  
 132 experiments, each based on a pool of 8 larvae. <sup>2</sup>Data are expressed as mean of Log CFU (Colony Forming  
 133 Units)/ml  $\pm$  S.D. obtained from haemolymph of 10 larvae, separately analyzed.

134

135 **Table S6. Primers for qRT-PCR analyses (F: Forward, R: Reverse).**

136

| <b>Primer name</b>    | <b>Sequence (5'-3')</b> | <b>Accession numbers</b>      |
|-----------------------|-------------------------|-------------------------------|
| Attacin 1 - F         | CGTTCTTAGACCGCAAGGAC    | <i>attacin 1</i> FQ971100.1   |
| Attacin 1 - R         | CACGGAAGTGGTCGGGCT      |                               |
| Gloverin - F          | GGCAGCACGGACGATTCTT     | <i>gloverin</i> FQ965511.1    |
| Gloverin - R          | CCGAGGTTGGTGCTGTCTCCGTT |                               |
| Lysozyme - F          | ATGAGGGATTGGGTGTGCC     | <i>lysozyme 1a</i> FQ961692.1 |
| Lysozyme - R          | TGGAACAGGCCGTAGTCCCG    |                               |
| 16S Ribosomal RNA - F | ACTCCTACGGGAGGCAGC      |                               |
| 16S Ribosomal RNA - R | ATTACCGCGGCTGCTGGC      |                               |

137

138

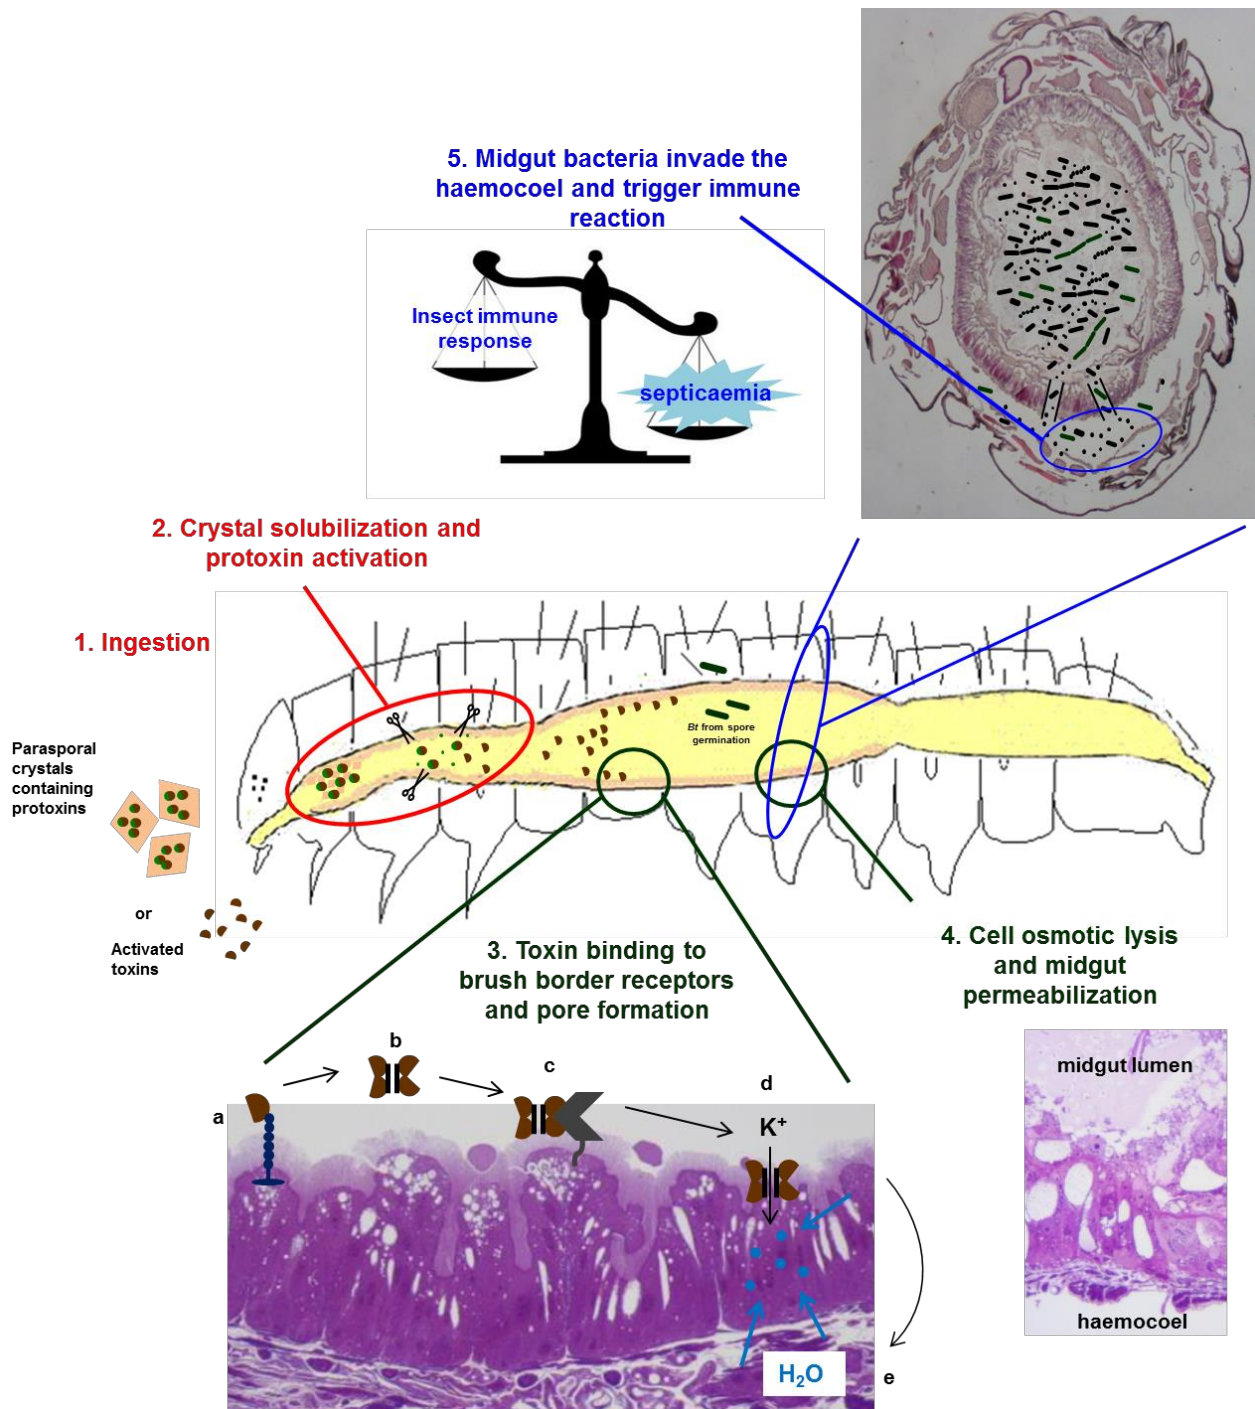

139

140

141 **Figure S1.** *Bacillus thuringiensis* (*Bt*) mode of action. *Bt* has been extensively used for insect  
 142 control as a spraying formulate (containing spores and crystals of Cry protoxins) and, more  
 143 recently, to develop *Bt*-crops, expressing active Cry toxins. After ingestion by susceptible insects  
 144 (1), crystals are solubilized in the midgut lumen and protoxins are cleaved to produce activated  
 145 toxins (2). The toxin crosses the peritrophic matrix and binds to specific primary receptors

146 (cadherins) located on the brush border membrane of the midgut cells (3a). Toxin binding to  
147 cadherins is associated with a small proteolytic cleavage, followed by the formation of toxin  
148 oligomers (3b) that bind to secondary receptors (aminopeptidase N and alkaline phosphatase  
149 isoforms) (3c). Binding to these proteins results in toxin insertion into the membrane, pore  
150 formation and cation influx into midgut cells (3d). Ion movement promotes a water influx (3e) and  
151 osmotic cell shock (4). Tissue damage (4) causes gut function paralysis and the passage of midgut  
152 bacteria to the body cavity (i.e. haemocoel) (5). The entrance of bacteria into the haemocoel triggers  
153 an immune reaction that, depending on the host immunocompetence and the degree of gut damage,  
154 may be able to limit the infection process, or may fail to block the onset of a lethal septicaemia.

155

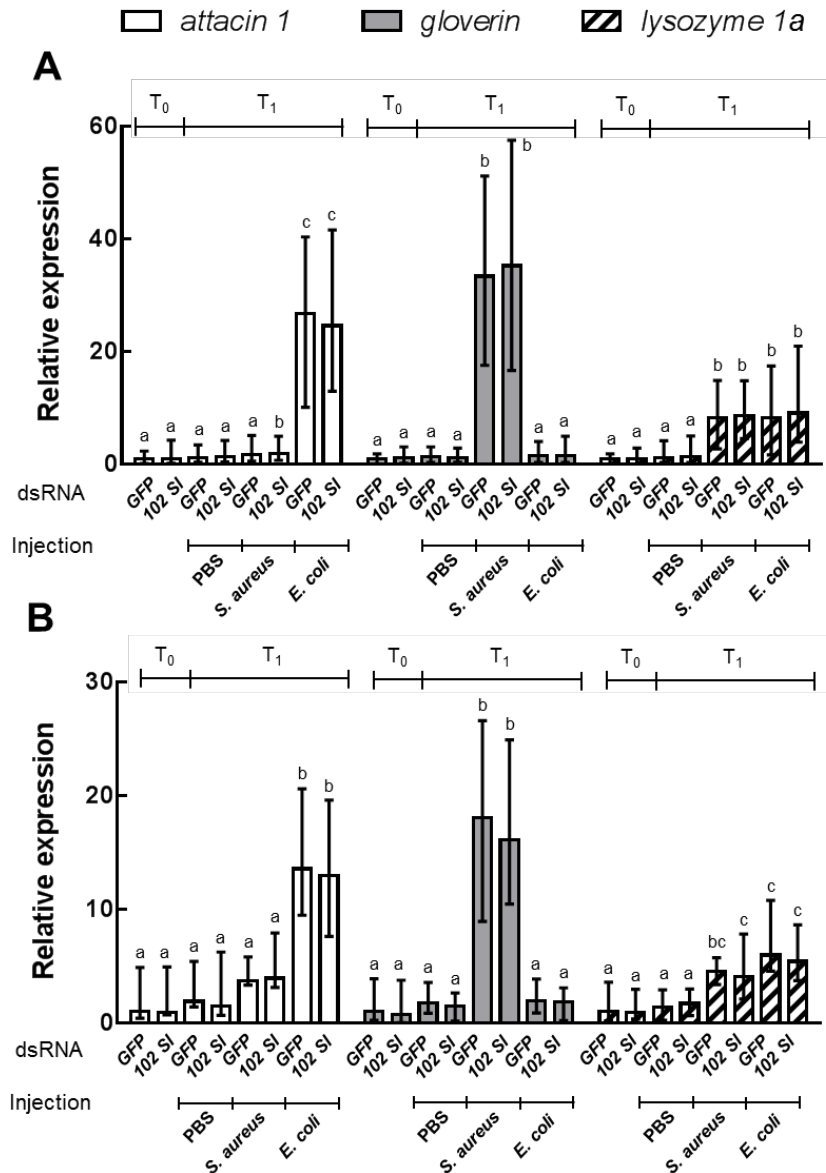

156

157

158 **Figure S2.** Humoral immune response by *Spodoptera littoralis* larvae as affected by RNAi  
 159 mediated silencing of the immune gene *102 SI*. The transcript level of the genes encoding the  
 160 humoral effectors considered was significantly enhanced by the immune challenge, both in the  
 161 midgut (A) (*attacin 1*  $F_{3,66}=83.23$ ,  $P<0.0001$ ; *gloverin*  $F_{3,66}=61.58$ ,  $P<0.0001$ ; *lysozyme 1a*  
 162  $F_{3,66}=62.38$ ,  $P<0.0001$ ) and in the fat body (B) (*attacin 1*  $F_{3,66}=27.86$   $P<0.0001$ ; *gloverin*  
 163  $F_{3,66}=26.16$ ,  $P<0.0001$ ; *lysozyme 1a*  $F_{3,66}=32.16$ ,  $P<0.0001$ ), but was not influenced by gene  
 164 silencing (Table S1). The values reported are the mean  $\pm$  S.E.; T<sub>0</sub> is the time at the injection, T<sub>1</sub> is

165 18 hours after injection; different letters denote significant differences between treatments

166 compared within each gene considered.

167



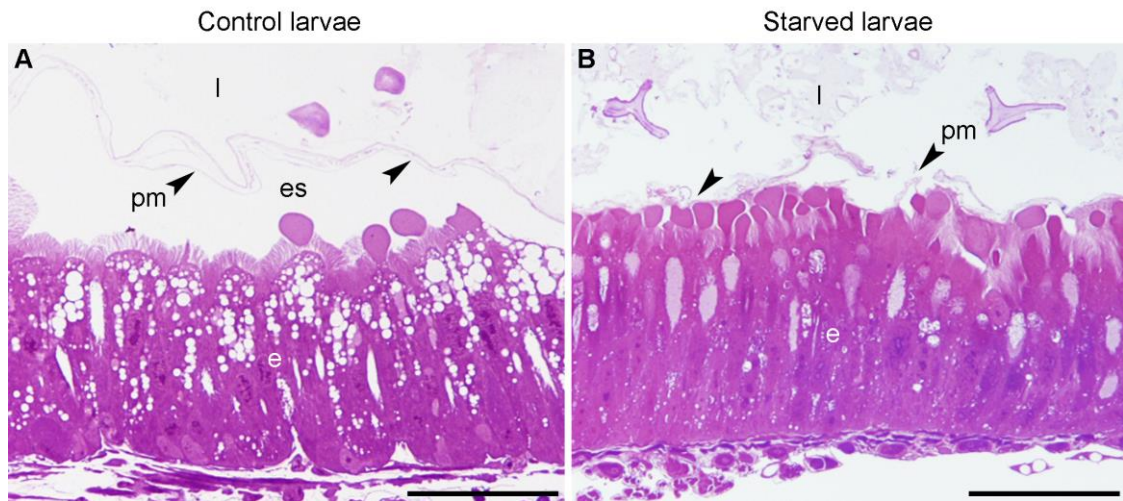

168

169

170 **Figure S3.** Midgut morphology of *Spodoptera littoralis* larvae as affected by starvation. Semi-thin  
 171 cross-sections of the midgut epithelium isolated from day 1 of 5<sup>th</sup> instar larvae (A), and from larvae  
 172 starved for 120 h, starting at the beginning of the 5<sup>th</sup> instar (B). The epithelial monolayer [e] appears  
 173 intact under both experimental conditions, while starvation induces the disruption of the peritrophic  
 174 matrix [pm] (arrowheads) and the disappearance of a well-delimited ectoperitrophic space [es] in  
 175 the midgut lumen [l]. The abbreviations used are reported in square brackets. Bars: 50  $\mu$ m.

176

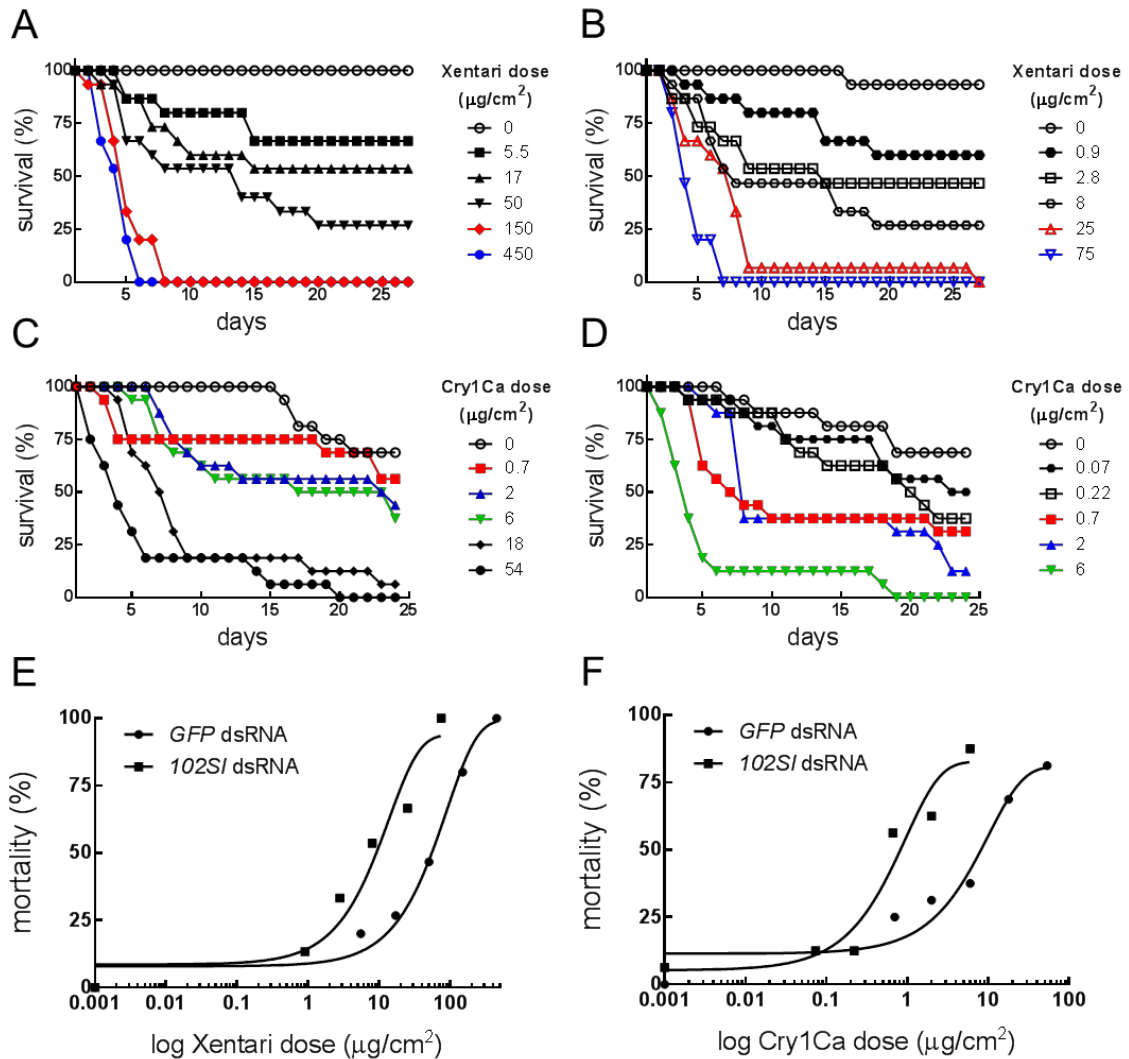

177

178

179 **Figure S4.** Survival of experimental larvae as affected by *Bt*, Cry1Ca toxin and gene silencing.

180 Survival (A-D) and mortality (E, F) curves, at day 8 from the onset of the bioassay (when  $LC_{50}$  was

181 calculated), recorded for *Spodoptera littoralis* larvae treated with *GFP* dsRNA (A, C) or *102 SI*

182 dsRNA (B, D), and exposed to different doses of Xentari™ or Cry1Ca. In A and B, the curves

183 corresponding to doses that induced the two highest mortality levels in control and silenced larvae

184 are represented with the same colors; in C and D colors are used for an immediate comparison of

185 the different effects induced by identical doses.

186

187

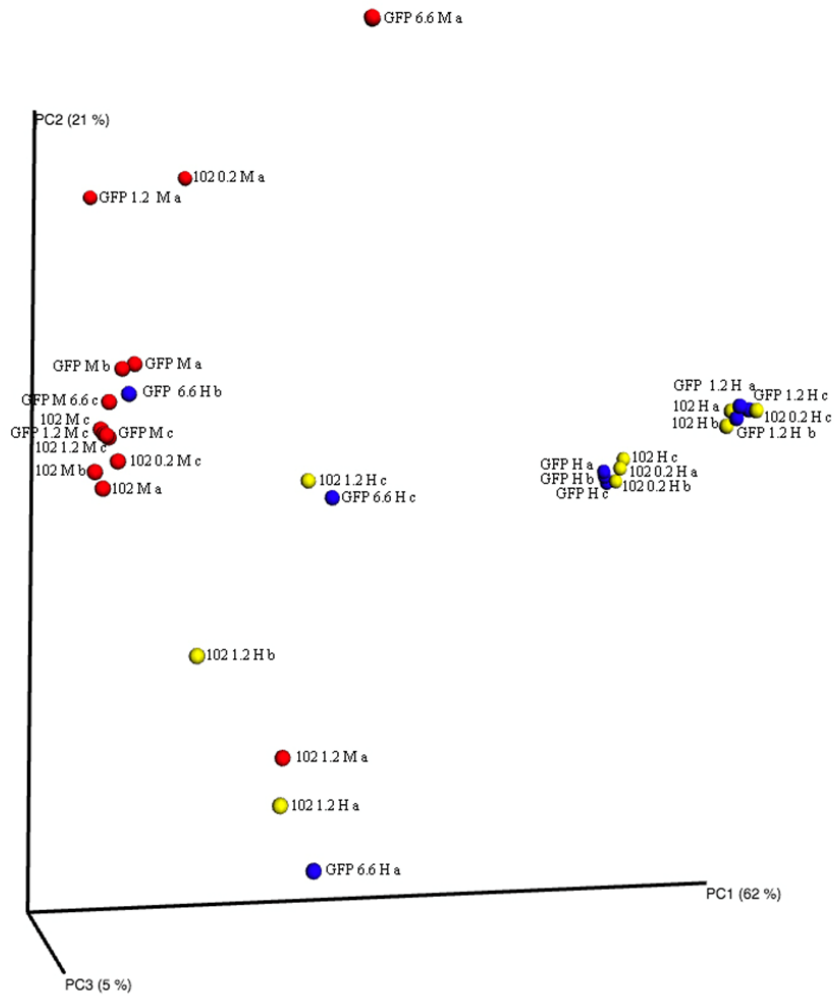

188

189

190 **Figure S5.** Phylogenetic beta diversity analysis. Principal Coordinates Analysis (PCoA) based on  
 191 weighted UniFrac distances for *16S rRNA* sequence data showing separation between midgut  
 192 content (M, red dots) and haemolymph (H) samples of *Spodoptera littoralis* larvae treated with *102*  
 193 *Sl* dsRNA (102, yellow dots) or *GFP* dsRNA (GFP, blue dots) and exposed to different doses of  
 194 *Cry1Ca*. Labels in samples IDs indicate replicate experiments (a, b, c).

195

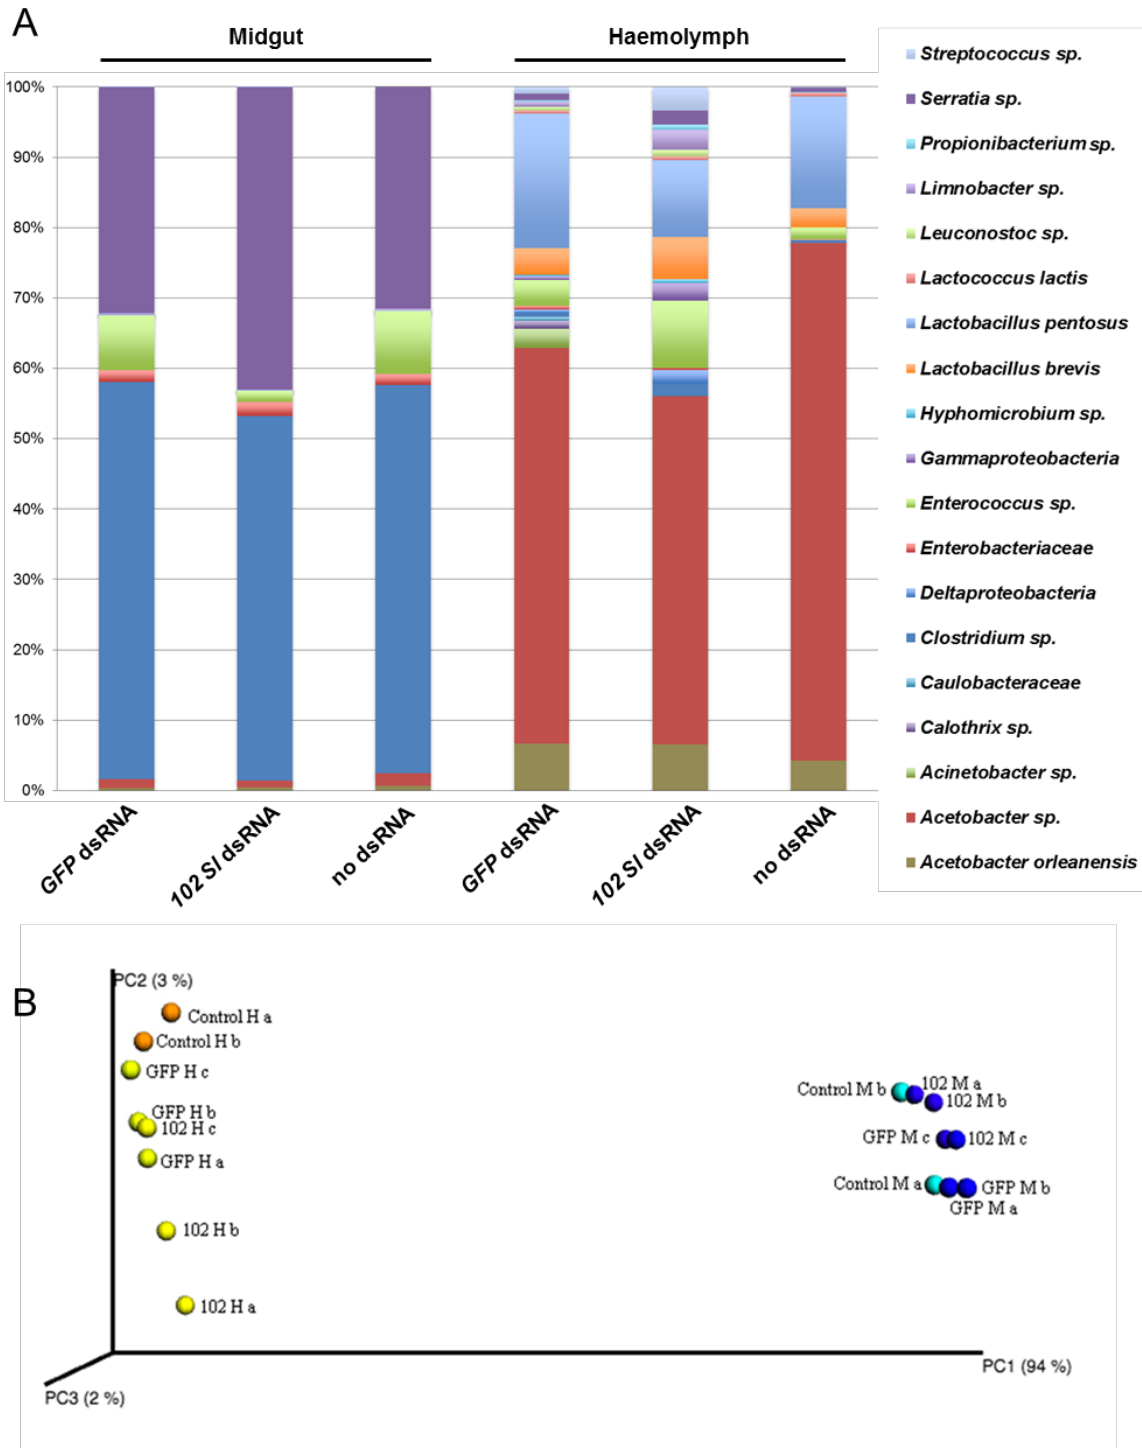

196

197 **Figure S6.** Impact of dsRNA gavage on midgut and haemolymph microbiota. (A) Incidence of the  
 198 major bacterial taxonomic groups detected by pyrosequencing. Relative abundance of identified  
 199 microbial taxa in the midgut content and haemolymph samples collected from *Spodoptera littoralis*  
 200 experimental control larvae treated with *102 SI* dsRNA, *GFP* dsRNA, or from unmanipulated  
 201 controls, not exposed to dsRNA gavage. (B) Principal Coordinates Analysis (PCoA) based on

202 weighted UniFrac distances for *16S rRNA* gene sequence. The data show separation between  
203 midgut (M, blue dots) and haemocoel (H, yellow dots) samples of *S. littoralis* larvae treated with  
204 *102 Sl* dsRNA or *GFP* dsRNA, and separation of midgut (sky blue dots) and haemocoel (orange  
205 dots) samples of untreated *S. littoralis* larvae. Labels in samples IDs indicate different replicate  
206 experiments (a, b, c).  
207

### 1. Bacterial counts by RT-PCR and nodulation assay during the bioassay

|                  | Days               |                    |                                         |                                    |                                         |                                         |                                         |
|------------------|--------------------|--------------------|-----------------------------------------|------------------------------------|-----------------------------------------|-----------------------------------------|-----------------------------------------|
|                  | 1 <sup>st</sup>    | 2 <sup>nd</sup>    | 3 <sup>rd</sup>                         | 4 <sup>th</sup>                    | 5 <sup>th</sup>                         | 6 <sup>th</sup>                         | 7 <sup>th</sup>                         |
| <u>morning</u>   | dsRNA <sup>1</sup> | dsRNA <sup>1</sup> | dsRNA <sup>1</sup>                      |                                    | Sampling <sup>2</sup> (T <sub>1</sub> ) | Sampling <sup>2</sup> (T <sub>2</sub> ) | Sampling <sup>2</sup> (T <sub>3</sub> ) |
| <u>afternoon</u> |                    |                    | Sampling <sup>2</sup> (T <sub>0</sub> ) |                                    |                                         |                                         |                                         |
|                  |                    |                    | Cry1Ca administration <sup>3</sup>      | Cry1Ca administration <sup>3</sup> | Cry1Ca administration <sup>3</sup>      |                                         |                                         |

<sup>1</sup> Oral administration of 150 ng of *102 Sl* dsRNA or *GFP* dsRNA (control).

<sup>2</sup> Dissection of *S. littoralis* larvae and isolation of samples to process for bacterial counts (midgut, haemolymph and haemocytes) at different time points.

<sup>3</sup> Oral administration of Cry1Ca toxin through artificial diet.

### 2. Antimicrobial peptides (AMP) and lysozyme expression determined by RT-PCR

|                  | Days               |                    |                                         |                                         |
|------------------|--------------------|--------------------|-----------------------------------------|-----------------------------------------|
|                  | 1 <sup>st</sup>    | 2 <sup>nd</sup>    | 3 <sup>rd</sup>                         | 4 <sup>th</sup>                         |
| <u>morning</u>   | dsRNA <sup>1</sup> | dsRNA <sup>1</sup> | dsRNA <sup>1</sup>                      | Sampling <sup>2</sup> (T <sub>1</sub> ) |
| <u>afternoon</u> |                    |                    | Sampling <sup>2</sup> (T <sub>0</sub> ) |                                         |
|                  |                    |                    | Bacterial injection <sup>3</sup>        |                                         |

<sup>1</sup> Oral administration of 150 ng of *102 Sl* dsRNA or *GFP* dsRNA (control).

<sup>2</sup> Dissection of *S. littoralis* larvae and isolation of samples to process for AMP and lysozyme expression profile (midgut, haemocytes and fat body) at different time points.

<sup>3</sup> Haemolymphatic injection of a PBS suspension of Gram positive (*Staphylococcus aureus*) or Gram negative (*Escherichia coli*) bacteria. PBS was injected into control larvae.

### 3. Metagenomic analysis and bacterial counts by culture-dependent method

|                  | Days               |                    |                                    |                                    |                                    |                 |                       |
|------------------|--------------------|--------------------|------------------------------------|------------------------------------|------------------------------------|-----------------|-----------------------|
|                  | 1 <sup>st</sup>    | 2 <sup>nd</sup>    | 3 <sup>rd</sup>                    | 4 <sup>th</sup>                    | 5 <sup>th</sup>                    | 6 <sup>th</sup> | 7 <sup>th</sup>       |
| <u>morning</u>   | dsRNA <sup>1</sup> | dsRNA <sup>1</sup> | dsRNA <sup>1</sup>                 |                                    |                                    |                 | Sampling <sup>3</sup> |
| <u>afternoon</u> |                    |                    | Cry1Ca administration <sup>2</sup> | Cry1Ca administration <sup>2</sup> | Cry1Ca administration <sup>2</sup> |                 |                       |

<sup>1</sup> Oral administration of 150 ng of *102 Sl* dsRNA or *GFP* dsRNA (control).

<sup>2</sup> Oral administration of Cry1Ca toxin through artificial diet.

<sup>3</sup> Dissection of *S. littoralis* larvae and isolation of samples to process for metagenomics analysis (midgut content and haemolymph).

208

209 **Figure S7.** Schematic representation of the experimental conditions and timing adopted.

210
